# Supplementary material for: Boosting Immunity and Management against Wheat Fusarium Diseases by a Sustainable, Circular Nanostructured Delivery Platform
Source: MDPI journal article supplement (doi:10.3390/plants12061223), 2023-03-08
Supplement: s1 [file plants-2239456-supplementary.pdf › plants-2239456-supplementary.pdf]

## Supplementary Materials - Tables

**Table S1.** Dry content (%) and yield (%) of CNC extracted from the bran of the wheat bread genotype Cadenza. Data are expressed as mean  $\pm$  standard deviation (SD) that were calculated from three independent extraction protocols.

|                 | I<br>replicate | II<br>replicate | III<br>replicate | Average $\pm$ standard<br>deviation |
|-----------------|----------------|-----------------|------------------|-------------------------------------|
| Dry content (%) | 0.4            | 0.8             | 0.3              | 0.5 $\pm$ 0.3                       |
| Yield (%)       | 26.6           | 10.1            | 9.3              | 15.3 $\pm$ 9.8                      |

**Table S2.** GA loading on CNC-NH<sub>2</sub>. GA binding was indirectly calculated by UV/VIS quantification of the supernatant after ultracentrifugation as the difference between the theoretical loading (15% w/w) and the amount of GA in solution. The GA loading efficiency was calculated as percentage of the bound GA amount and the GA amount added.

| Entry | CNC-NH <sub>2</sub><br>(g) | Theoretical loading<br>(g) | GA in solution<br>(g) | GA content<br>(% w/w) | Loading efficiency<br>(% w/w) |
|-------|----------------------------|----------------------------|-----------------------|-----------------------|-------------------------------|
| 1     | 0.5                        | 0.088                      | 0.041 $\pm$           | 8.6                   | 53                            |
| 2     | 0.75                       | 0.132                      | 0.070 $\pm$           | 7.6                   | 47                            |
| 3     | 1.5                        | 0.265                      | 0.106 $\pm$           | 9.6                   | 60                            |
| 4     | 3.0                        | 0.530                      | 0.141 $\pm$           | 11.5                  | 73                            |

**Table S3.** Characterization of the nanostructured particle formulation (NPF). Batch size accounts for the CNC-NH<sub>2</sub>/GA, CH, HSA (1:1:2, w/w/w) and Tween 80 (T80, 0.25% w/w) amount fed to the spray dryer. Yield was calculated as the ratio between the amount of the powder collected and the starting batch size. GA and CH contents represent the bioactive compound amount per unit of weight of formulation. GA and CH recovery was calculated as the ratio between the amount of the bioactive compounds loaded and that recovered after spray-drying.

| Entry | Batch size<br>(g)  | Dried powder<br>(g) | Yield<br>(%) | GA recovery<br>(% w/w) | GA content<br>(% w/w) | CH recovery<br>(% w/w) | CH content<br>(% w/w) |
|-------|--------------------|---------------------|--------------|------------------------|-----------------------|------------------------|-----------------------|
| 1     | 2.083 (0.083 T80)  | 0.952               | 46           | 18.6 $\pm$             | 1.5 $\pm$             | 54.0 $\pm$             | 29.5 $\pm$            |
| 2     | 3.125 (0.125 T80)  | 1.310               | 42           | 20.6 $\pm$             | 1.8 $\pm$             | 44.9 $\pm$             | 26.8 $\pm$            |
| 3     | 6.250 (0.250 T80)  | 2.780               | 44           | 22.1 $\pm$             | 1.9 $\pm$             | 32.7 $\pm$             | 18.4 $\pm$            |
| 4     | 12.500 (0.500 T80) | 7.92                | 63           | 49.2 $\pm$             | 2.9 $\pm$             | 69.6 $\pm$             | 27.5 $\pm$            |

**Table S4.** List of *Triticum aestivum* selected genes, accession numbers, gene function, primer pairs, amplicon length from DNA and cDNA and primer pairs references.

| Gene and<br>Accession<br>number | Function                            | Primer pairs (5'-3')                            | bp<br>(DNA) | bp<br>(cDNA) | Reference |
|---------------------------------|-------------------------------------|-------------------------------------------------|-------------|--------------|-----------|
| <i>TaMAPK</i><br>AF079318       | Mitogen activated<br>protein kinase | CATCGACGTCTGGTCCGT<br>GTCCTCGTTCCGGATGAATC      | 154         | 154          | [21]      |
| <i>TaICS</i><br>XM_020328818.2  | Isochorismate<br>synthase           | TTCAGCTCCACCAAACCAACCA<br>GGTTTGCCCACTGAAGAAGCG | 195         | 99           | [83]      |
| <i>TaCHI</i><br>XM_020330684.2  | Endochitinase                       | GCGTGTA CTTCCTGTCGCAGTA<br>CGGCCAACCCCAACTTC    | 243         | 155          | [84]      |

|                                 |                                               |                                                           |     |     |               |
|---------------------------------|-----------------------------------------------|-----------------------------------------------------------|-----|-----|---------------|
| <i>TaPR1</i><br>AJ007348        | Pathogenesis<br>related protein 1             | ACTACGACTACGGGTCCAACA<br>TCGTAGTTGCAGGTGATGAAG            | 145 | 145 | [85]          |
| <i>TaLOX</i><br>XM_020345935.2  | Lipoxigenase                                  | AACAAGTTCGCCGTACCTT<br>TTGTCGAGGGTGATGGTCTT               | 115 | 115 | [81]          |
| <i>TaWRKY</i><br>XM_020332576.2 | Transcription<br>factor                       | CAAGGCAACAAATCGTGACATG<br>GAGTCCTACTGAACTGAGCTACCG<br>A   | 120 | 120 | [86]          |
| <i>TaPR5</i><br>XM_037606909.1  | Thaumatococcus-like<br>protein                | AGGTAATTTTTTTATTGCCCTGTAC<br>TG<br>TTACAGCCGCCGTACTACATGT | 86  | 86  | [86]          |
| <i>TaAOS</i><br>AY196004        | Allene Oxide<br>Synthase                      | TCGGGCGTATTGCTGAGG<br>TGCAGCAGCTTGCTTCTCTC                | 352 | 352 | [21]          |
| <i>TaPR2</i><br>Y18212          | B-1,3-<br>endoglucanase                       | AACGTGCGCCCCTACTACC<br>GCGTCGAACAGGCTCGTGTA               | 398 | 398 | [21]          |
| <i>TaCDPK</i><br>KU516994       | Calcium<br>dependent protein<br>kinase        | CTTCTTTGTGGTGTCCTCC<br>GCTGTCAAACGCCTCCTT                 | 436 | 436 | [21]          |
| <i>TaRBOH</i><br>AY561153       | NADPH oxidase                                 | TTGTTGGATTAGGAATTGGTGCT<br>TGATCCATGTCGGCAATCTC           | 441 | 280 | [21]          |
| <i>TaPAL</i><br>X99705          | Phenylalanine<br>ammonia lyase                | CGATGCTCGTCCGAGTCAAT<br>CATGACCTCACAGAAGACGC              | 407 | 407 | [19]          |
| <i>TaNPR1</i><br>KU736862.1     | Non-expresser of<br>PR genes 1                | AAAACAGTGGAAGTGGGCCG<br>TTATCGGCCGTGTCTTTGCT              | 200 | 200 | This<br>study |
| <i>TaPDF</i><br>KJ551516.1      | JA-mediated<br>defensin                       | ACTACGAGCGCAAGTGCTTCT<br>ATCATGGGACGTGTCTCGGC             | 89  | 89  | This<br>study |
| <i>TaPR10</i><br>CA684431       | Pathogenesis<br>related protein 10<br>(RNase) | TTAAACCAGCACGAGAAACATCA<br>G<br>ATCCTCCCTCGATTATTCTCACG   | 158 | 158 | [87]          |
| <i>TaPR12</i><br>AB089942.1     | Defensin                                      | GATGCTTGCTACTGGGCTAGA<br>AGCACAAACTAAAGCCACGAA            | 186 | 186 | [88]          |

|                                   |                                                        |                                                         |     |     |      |
|-----------------------------------|--------------------------------------------------------|---------------------------------------------------------|-----|-----|------|
| <i>TaPR14</i><br>AK449210.1       | Lipid transfer<br>protein                              | ACGTAGGTACTCCTCTCGCTGT<br>GTTGATCGACCACTTCTTCTCG        | 148 | 148 | [85] |
| <i>TaPEN1</i><br>BJ285699         | Syntaxin                                               | ATCTCTTGGAGTGTGTCGAGCAC<br>AAGCTGATAGAAACAGGCGACAG<br>T | 167 | 91  | [86] |
| <i>TaFMO1</i><br>KF924400         | Flavin-dependent<br>monooxygenase 1                    | CCGGTATTGCCATGGATGC<br>AATTTTGCAGCATCTGATCGAA           | 157 | 157 | [89] |
| <i>TaLLP1</i><br>XM_037581219.1   | Legume lectin-like<br>protein 1                        | AGGAGTGCCCCGTCAAGATTG<br>TCGTAGGTGCCGCTGATGAAG          | 271 | 271 | [90] |
| <i>TaCAMTA3</i><br>XM_037620416.1 | Calmodulin-<br>binding<br>transcription<br>activator 3 | GGGGAGGAGTGACGACGAC<br>CGCAGCCATCGATTCTGA               | 530 | 141 | [91] |
| <i>TaAGPL</i><br>DQ406820         | ADP-glucose-<br>pyrophosphorylas<br>e large subunit    | GGCTCCAACGTACACCTCAA<br>CTGGTCGCCTCTTTCCATGT            | 168 | 78  | [92] |
| <i>TaAGPS</i><br>AF492644         | ADP-glucose-<br>pyrophosphorylas<br>e small subunit    | CCGGAGATCACCTGTACCGA<br>GTCGCACGTTTCCTCATCCAT           | 109 | 109 | [92] |
| <i>TaGBSII</i><br>AF109395        | Granule bound<br>starch synthase                       | CACAGAATGCCAGAGGCATAG<br>GAACAGATGGGAATCACTCCA          | 245 | 151 | [93] |
| <i>TaAlnv</i><br>AM295169         | Alkaline invertase                                     | CCCCCTTGTGAATGAGGCATGGGA<br>ACCCACAGGTTGGCCACGAAAATG    | 70  | 70  | [92] |
| <i>TaACT</i><br>AB181991          | Actin                                                  | TCCTGTGTTGCTGACTGAGG<br>GGTCCAAACGAAGGATAGCA            | 350 | 236 | [94] |
| <i>TaTUB</i><br>TAU76745          | B-tubulin                                              | CGAGGAGGGCGAGTACGA<br>AGCAAAGCACGACATGGACAT             | 79  | 79  | [78] |
| <i>TaFNR</i><br>AJ457980          | Ferredoxin-<br>NADP(H)-<br>oxidoreductase              | CACCGGCCCAGTGATCTT<br>AAGGGCGTCTGCTCCAAC                | 259 | 69  | [78] |

---

**Table S5.** List of *Fusarium graminearum*, *Fusarium culmorum* and *Triticum aestivum* selected genes, accession numbers, gene function, primer pairs, amplicon length from DNA and primer pairs references used for fungal biomass quantification.

| Gene and<br>Accession<br>number | Function                                      | Primer pairs (5'-3')                                 | bp<br>(DNA) | Reference |
|---------------------------------|-----------------------------------------------|------------------------------------------------------|-------------|-----------|
| <i>TaACT</i><br>AB181991        | Actin                                         | TCCTGTGTTGCTGACTGAGG<br>GGTCCAAACGAAGGATAGCA         | 350         | [94]      |
| <i>FgTRI6</i><br>AB017495.1     | Trichothecene<br>transcriptional<br>regulator | TCTTTGTGAGCGGACGGGACTTTA<br>ATCTCGCATGTTATCCACCCTGCT | 245         | [80]      |
| <i>FcTRI5</i><br>AY130291       | Trichodiene<br>synthase                       | CACTTTGCTCAGCCTCGCC<br>CGATTGTTTGGAGGGAAGCC          | 76          | [95]      |

## Supplementary Materials – Figures

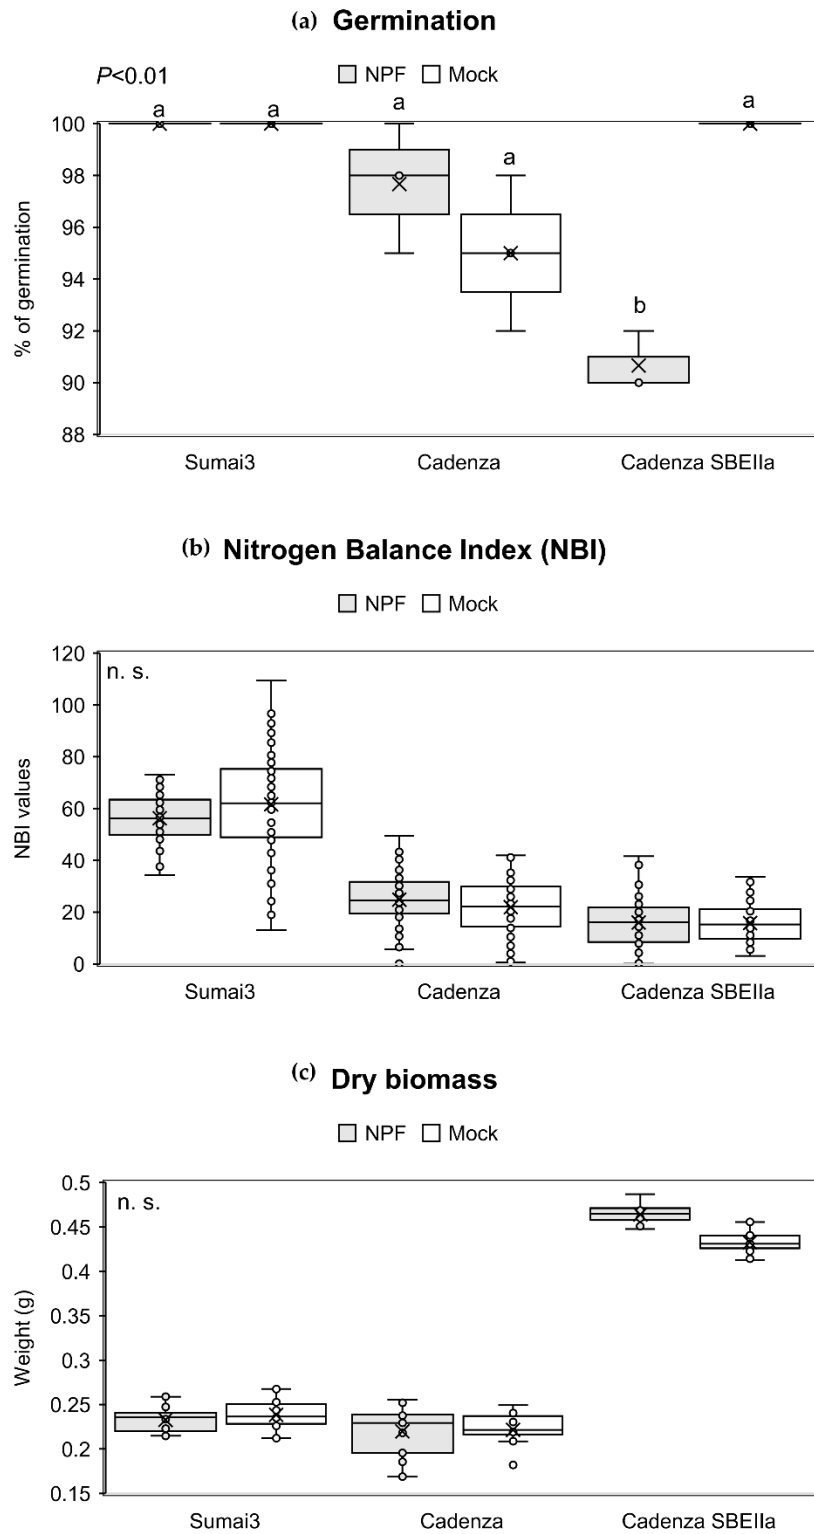

**Supplementary Figure S1.** *In planta* biocompatibility assay. Boxplots of the germination assay (a); the % of germinated kernels was recorded at 14 days after germination. Boxplots of the NBI measurements (b); NBI values were recorded at 14 days after germination. Boxplots of the dry biomass measurements (c); plantlets were collected at 14 days after germination and weighted after drying at 60°C for 24 h. The boxplots have been obtained by plotting the data collected from three independent experiments, each one consisting of twenty plantlets for each experimental group. Different

letters (a, b) into the subfigures refer to the statistical analysis performed using one-way analysis of variance (ANOVA) with the Tukey test at a confidence level of 0.99 and  $P < 0.01$ , while “n. s.” stands for “not significant”.

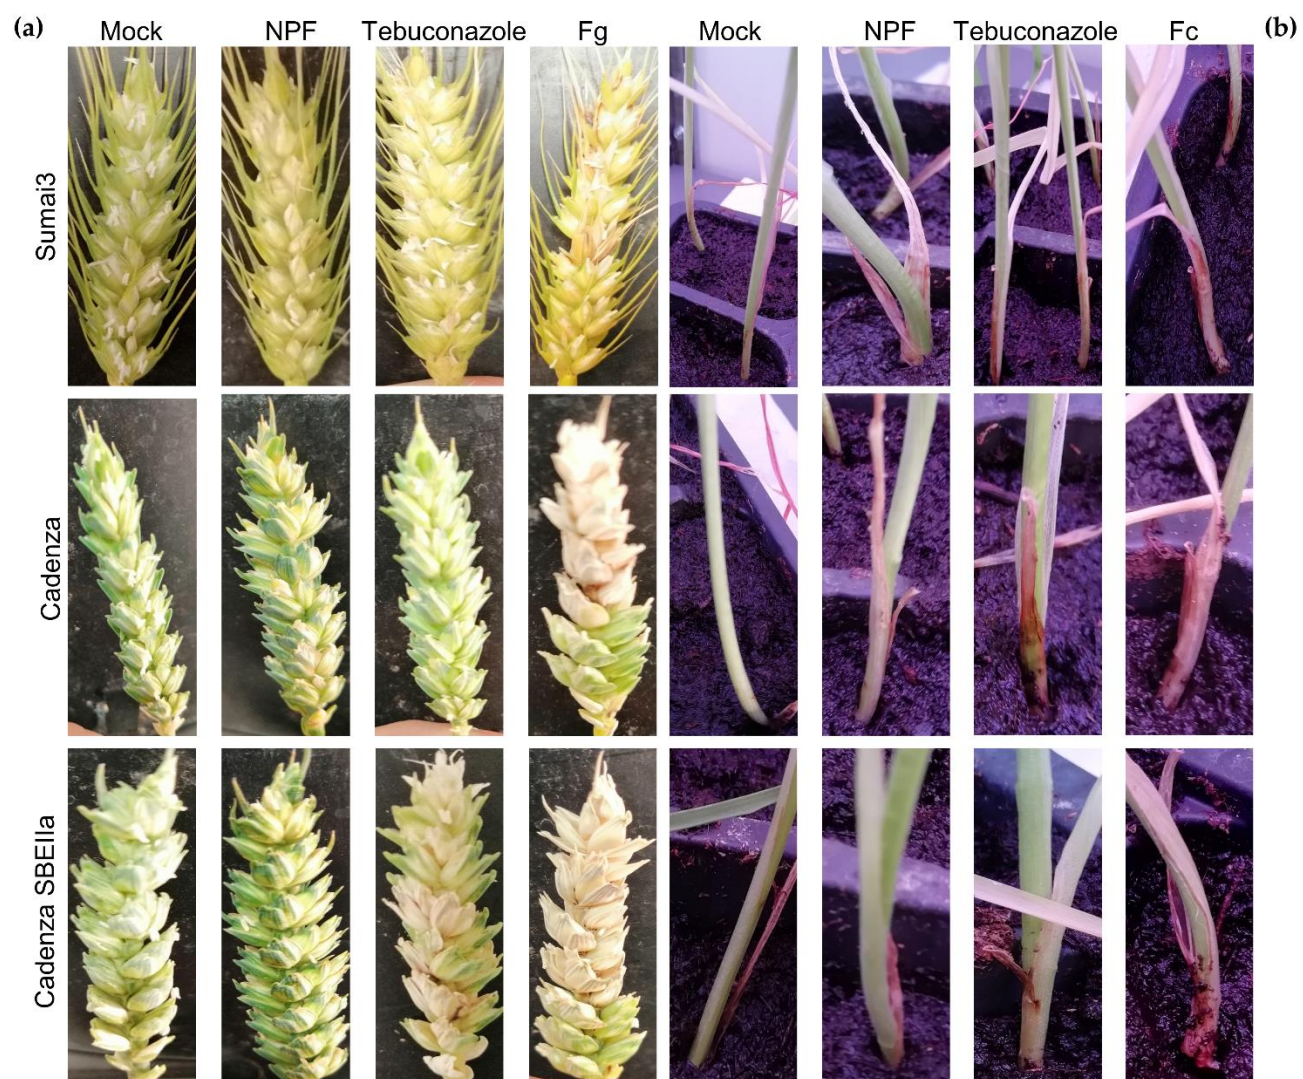

**Supplementary Figure S2.** Representative pictures of treated and inoculated spikes with *Fusarium graminearum* at 21 days post inoculation (dpi) (a) and of treated and inoculated coleoptile with *Fusarium culmorum* at 20 dpi.

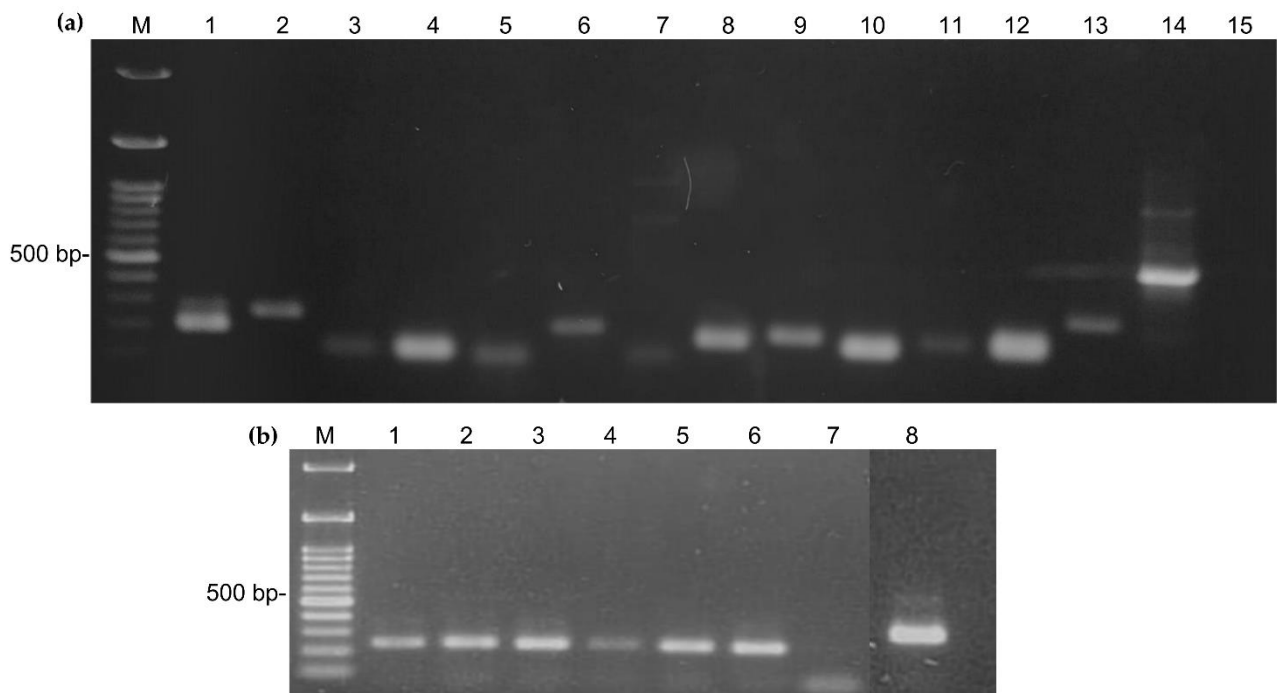

**Supplementary Figure S3.** 1.5% agarose gel of selected genes amplified by using the primer pair listed in Table S4. M) DM2300 ExcelBand™ 100 bp+3K DNA Ladder (Smobio); 1) *TaICS*, 2) *TaCHI*, 3) *TaLOX*, 4) *TaWRKY*, 5) *TaPR5*, 6) *TaNPR1*, 7) *TaPDF*, 8) *TaPR10*, 9) *TaPR12*, 10) *TaPR14*, 11) *TaPEN1*, 12) *TaFMO1*, 13) *TaLLP1*, 14) *TaCAMTA3*, 15) Negative control (a). 1.5% agarose gel of RT-PCR of *TaACT* amplified from Sumai3, Cadenza and Cadenza SBEIIa. M) DM2300 ExcelBand™ 100 bp+3K DNA Ladder (Smobio); 1) and 2) *TaACT* from Sumai3, 3) and 4) *TaACT* from Cadenza, 5) and 6) *TaACT* from Cadenza SBEIIa, 7) Negative control, 8) *TaACT* from gDNA (b).

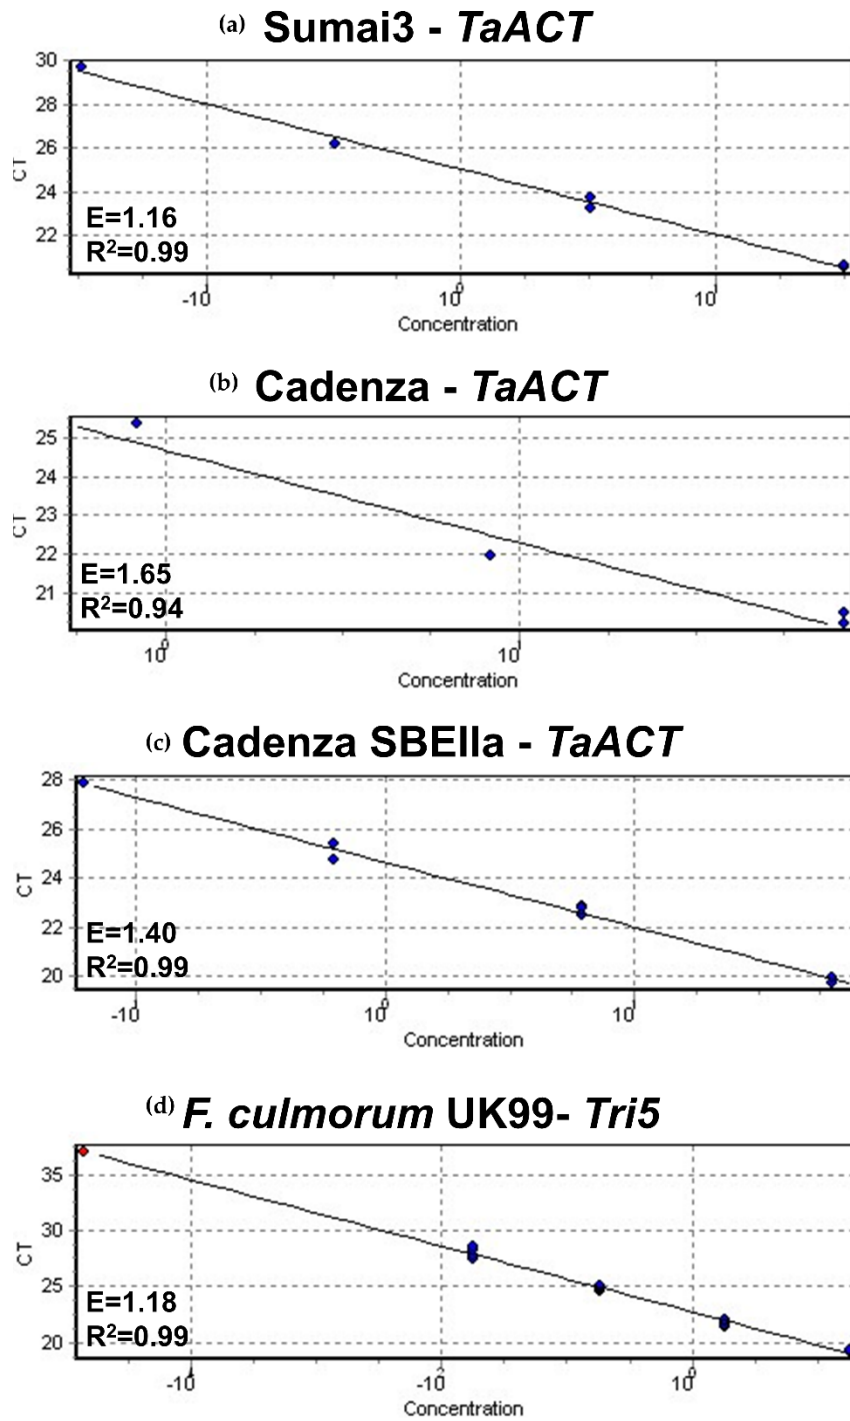

**Supplementary Figure S4.** Standard curves for the *TaACT* in Sumai3 (a), Cadenza (b) and Cadenza SBElIa (c) and *Tri5* (d) genes for the Real-Time qPCR quantification of the fungal biomass. The standard curve for the *Tri6* quantification was already obtained and validated in a previous work [22].



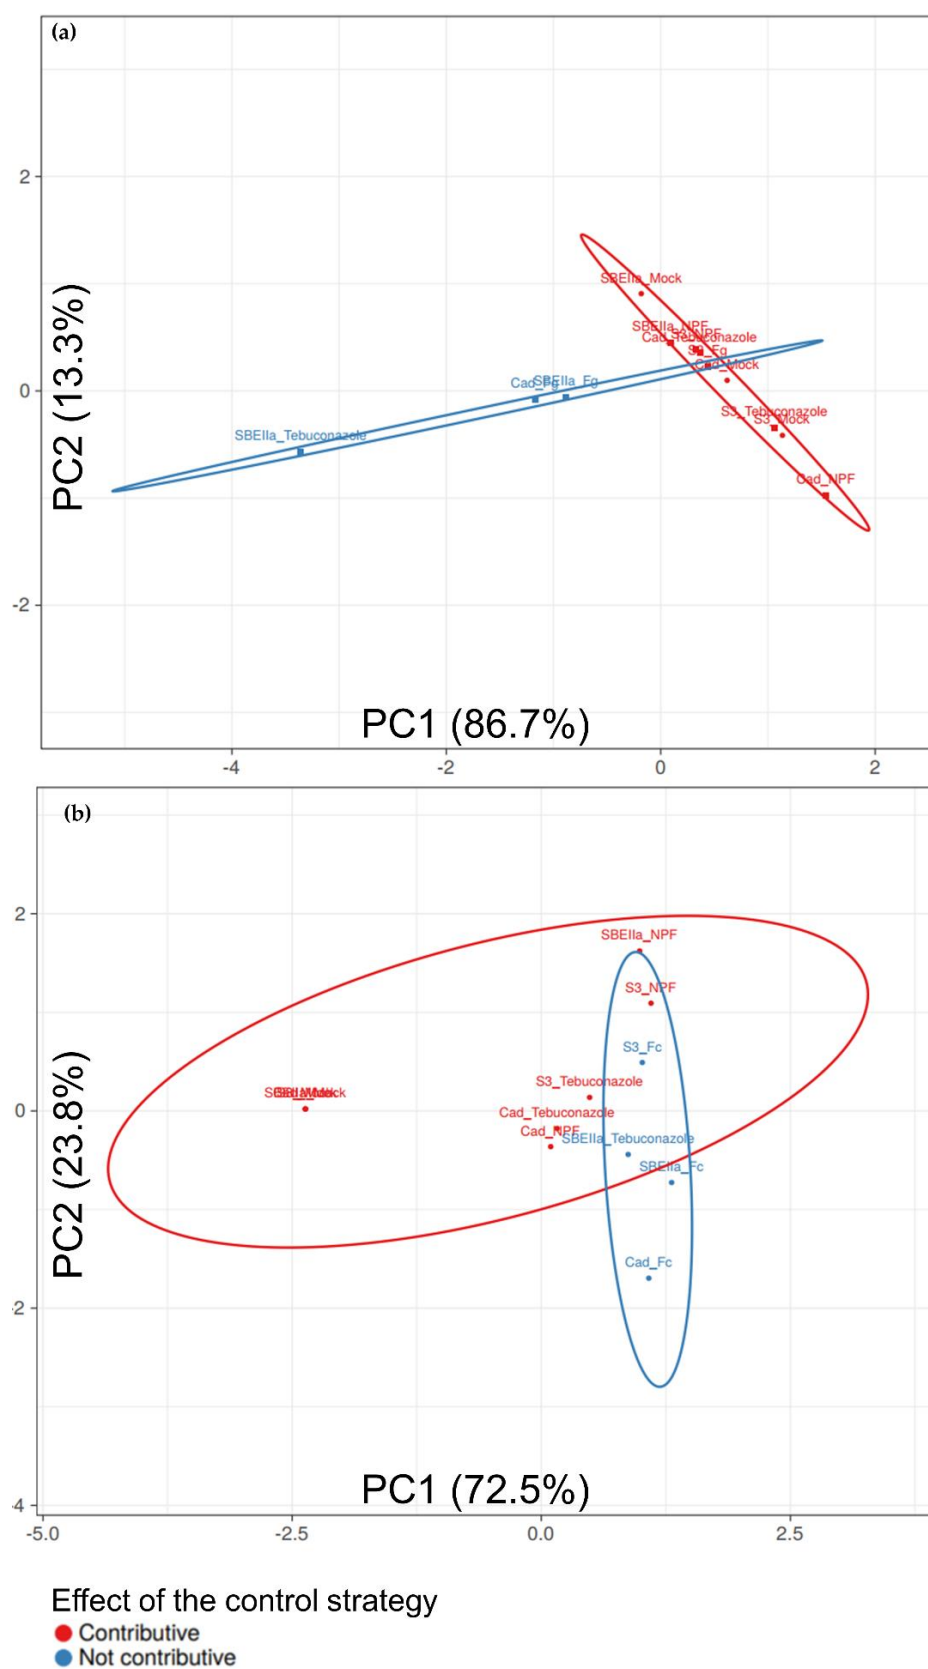

**Supplementary Figure S5.** Principal Components Analysis (PCA) carried out to investigate the effective contribution on controlling FHB and FCR. The PCA on FHB data was carried out by plotting FHB incidence and severity at 21 dpi, impact on final yield and ng of fungal DNA/ng of plant DNA (a). The PCA on FCR data was carried out by plotting FCR

incidence and severity at 20 dpi and ng of fungal DNA/ng of plant DNA (b). PCA were conducted by using ClustVis software (Tartu, Estonia).

## References

21. Francesconi, S.; Balestra, G.M. The modulation of stomatal conductance and photosynthetic parameters is involved in Fusarium head blight resistance in wheat. *PLoS One* **2020**, *15*, e0235482, doi:10.1371/journal.pone.0235482.
83. Kovács, V.; Gondor, O.K.; Szalai, G.; Darkó, É.; Majláth, I.; Janda, T.; Pál, M. Synthesis and role of salicylic acid in wheat varieties with different levels of cadmium tolerance. *J. Hazard. Mater.* **2014**, *280*, 12–19, doi:10.1016/j.jhazmat.2014.07.048.
84. Bolton, M.D.; Kolmer, J.A.; Xu, W.W.; Garvin, D.F. Lr34-mediated leaf rust resistance in wheat: transcript profiling reveals a high energetic demand supported by transient recruitment of multiple metabolic pathways. *Mol. Plant-Microbe Interact.* **2008**, *21*, 1515–1527, doi:10.1094/MPMI-21-12-1515.
85. Lu, Z.X.; Gaudet, D.; Puchalski, B.; Despins, T.; Frick, M.; Laroche, A. Inducers of resistance reduce common bunt infection in wheat seedlings while differentially regulating defence-gene expression. *Physiol. Mol. Plant Pathol.* **2006**, *67*, 138–148, doi:10.1016/j.pmpp.2005.12.001.
81. Beccari, G.; Covarelli, L.; Nicholson, P. Infection processes and soft wheat response to root rot and crown rot caused by Fusarium culmorum. *Plant Pathol.* **2011**, *60*, 671–684, doi:10.1111/j.1365-3059.2011.02425.x.
86. Desmond, O.J.; Manners, J.M.; Stephens, A.E.; Maclean, D.J.; Schenk, P.M.; Gardiner, D.M.; Munn, A.L.; Kazan, K. The Fusarium mycotoxin deoxynivalenol elicits hydrogen peroxide production, programmed cell death and defence responses in wheat. *Mol. Plant Pathol.* **2008**, *9*, 435–445, doi:10.1111/j.1364-3703.2008.00475.x.
19. Francesconi, S.; Steiner, B.; Buerstmayr, H.; Lemmens, M.; Sulyok, M.; Balestra, G.M. Chitosan hydrochloride decreases Fusarium graminearum growth and virulence and boosts growth, development and systemic acquired resistance in two durum wheat genotypes. *Molecules* **2020**, *25*, 4752, doi:10.3390/molecules25204752.
87. Desmond, O.J.; Edgar, C.I.; Manners, J.M.; Maclean, D.J.; Schenk, P.M.; Kazan, K. Methyl jasmonate induced gene expression in wheat delays symptom development by the crown rot pathogen Fusarium pseudograminearum. *Physiol. Mol. Plant Pathol.* **2006**, *67*, 171–179, doi:10.1016/j.pmpp.2005.12.007.
88. Gaudet, D.A.; Wang, Y.; Frick, M.; Puchalski, B.; Penniket, C.; Ouellet, T.; Robert, L.; Singh, J.; Laroche, A. Low temperature induced defence gene expression in winter wheat in relation to resistance to snow moulds and other wheat diseases. *Plant Sci.* **2011**, *180*, 99–110, doi:10.1016/j.plantsci.2010.07.023.
89. Li, N.; Yin, N.; Niu, Z.; Hui, W.; Song, J.; Huang, C.; Wang, H.; Kong, L.; Feng, D. Isolation and characterization of three TaYUC10 genes from wheat. *Gene* **2014**, *546*, 187–194, doi:10.1016/j.gene.2014.06.020.
90. Xiang, Y.; Song, M.; Wei, Z.; Tong, J.; Zhang, L.; Xiao, L.; Ma, Z.; Wang, Y. A jacalin-related lectin-like gene in wheat is a component of the plant defence system. *J. Exp. Bot.* **2011**, *62*, 5471–5483, doi:10.1093/jxb/err226.
91. Yang, F.; Dong, F.S.; Hu, F.H.; Liu, Y.W.; Chai, J.F.; Zhao, H.; Lv, M.Y.; Zhou, S. Genome-wide identification and expression analysis of the calmodulin-binding transcription activator (CAMTA) gene family in wheat (*Triticum aestivum* L.). *BMC Genet.* **2020**, *21*, 1–10, doi:10.1186/s12863-020-00916-5.
92. Vicente, R.; Pérez, P.; Martínez-Carrasco, R.; Usadel, B.; Kostadinova, S.; Morcuende, R. Quantitative RT-PCR platform to measure transcript levels of C and N metabolism-related genes in durum wheat: transcript profiles in elevated [CO<sub>2</sub>] and high temperature at different levels of N supply. *Plant Cell Physiol.* **2015**, *56*, 1556–1573, doi:10.1093/pcp/pcv079.
93. Wang, Z.; Li, W.; Qi, J.; Shi, P.; Yin, Y. Starch accumulation, activities of key enzyme and gene expression in starch synthesis of wheat endosperm with different starch contents. *J. Food Sci. Technol.* **2014**, *51*, 419–429, doi:10.1007/s13197-011-0520-z.
94. Tundo, S.; Janni, M.; Moschetti, I.; Mandalá, G.; Savatin, D.; Blechl, A.; Favaron, F.; D'Ovidio, R. PvPGIP2 accumulation in specific floral tissues but not in the endosperm limits Fusarium graminearum infection in wheat. *Mol. Plant-Microbe Interact.* **2016**, *29*, 815–821, doi:10.1094/MPMI-07-16-0148-R.
78. Tenea, G.N.; Peres Bota, A.; Cordeiro Raposo, F.; Maquet, A. Reference genes for gene expression studies in wheat flag leaves grown under different farming conditions. *BMC Res. Notes* **2011**, *4*, 373, doi:10.1186/1756-0500-4-373.
80. Horevaji, P.; Milus, E.A.; Bluhm, B.H. A real-time qPCR assay to quantify Fusarium graminearum biomass in wheat kernels. *J. Appl. Microbiol.* **2011**, *111*, 396–406, doi:10.1111/j.1365-2672.2011.05049.x.
95. Mudge, A.M.; Dill-Macky, R.; Dong, Y.; Gardiner, D.M.; White, R.G.; Manners, J.M. A role for the mycotoxin deoxynivalenol in stem colonisation during crown rot disease of wheat caused by Fusarium graminearum and Fusarium pseudograminearum. *Physiol. Mol. Plant Pathol.* **2006**, *69*, 73–85, doi:10.1016/j.pmpp.2007.01.003.
22. Francesconi, S.; Mazzaglia, A.; Balestra, G.M. Different inoculation methods affect components of Fusarium head blight resistance in wheat. *Phytopathol. Mediterr.* **2019**, *58*, 679–691, doi:10.13128/Phyto-10942.
